1 **Quantitative variation within a species for traits underpinning C<sub>4</sub> photosynthesis**

2

3

4 Gregory Reeves<sup>1\*</sup>, Pallavi Singh<sup>1\*</sup>, Timo A. Rossberg<sup>1</sup>, E. O. Deedi Sogbohossou<sup>2</sup>, M. Eric Schranz<sup>2</sup>,

5 Julian M. Hibberd<sup>1</sup>

6

7

8

9

10

11 <sup>1</sup>Department of Plant Sciences, Downing Street, University of Cambridge, Cambridge CB2 3EA,

12 United Kingdom.

13

14 <sup>2</sup>Biosystematics Group, Department of Plant Sciences, Wageningen University, Wageningen 6700

15 AA, The Netherlands.

16

17 \*These authors contributed equally to this work.

18

19 Correspondence to [jmh65@cam.ac.uk](mailto:jmh65@cam.ac.uk)

20

21 **Key Words:** Natural variation, C<sub>4</sub> photosynthesis, Kranz anatomy, *Gynandropsis gynandra*

22

23

24 **Running title:** Natural variation in C<sub>4</sub> photosynthesis

25 **Engineering C<sub>4</sub> photosynthesis into C<sub>3</sub> crops such as rice or wheat could substantially**  
26 **increase their yield by alleviating photorespiratory losses<sup>1,2</sup>. This objective is challenging**  
27 **because the C<sub>4</sub> pathway involves complex modifications to the biochemistry, cell biology and**  
28 **anatomy of leaves<sup>3</sup>. Forward genetics has provided limited insight into the mechanistic basis**  
29 **of these characteristics and there have been no reports of significant quantitative intra-**  
30 **specific variation of C<sub>4</sub> attributes that would allow trait-mapping<sup>4,5</sup>. Here we show that**  
31 **accessions of C<sub>4</sub> *Gynandropsis gynandra* collected from locations across Africa and Asia**  
32 **exhibit natural variation in key characteristics of C<sub>4</sub> photosynthesis. Variable traits include**  
33 **bundle sheath size and vein density, gas exchange parameters and carbon-isotope**  
34 **discrimination associated with the C<sub>4</sub> state, but also abundance of transcripts encoding core**  
35 **enzymes of the C<sub>4</sub> cycle. Traits relating to water use showed more quantitative variation than**  
36 **those associated with carbon assimilation. We propose variation in these traits likely adapted**  
37 **the hydraulic system for increased water use efficiency rather than improving carbon fixation,**  
38 **indicating that selection pressure may drive C<sub>4</sub> diversity in *G. gynandra* by acting to modify**  
39 **water use rather than photosynthesis. As these accessions can be easily crossed and**  
40 **produce fertile offspring, our findings indicate that natural variation within a C<sub>4</sub> species is**  
41 **sufficiently large to allow genetic-mapping of key anatomical C<sub>4</sub> traits and regulators.**

42 Plants that use C<sub>4</sub> photosynthesis can effectively abolish photorespiratory losses caused when  
43 Ribulose 1,5-Bisphosphate Carboxylase/Oxygenase (RuBisCO) fixes oxygen rather than CO<sub>2</sub><sup>6,7</sup>. In  
44 C<sub>4</sub> plants, RuBisCO is typically sequestered in bundle sheath (BS) cells that are concentrically  
45 arranged around the vasculature. Establishment of a molecular CO<sub>2</sub> pump delivers carbon to  
46 RuBisCO from Mesophyll (M) cells via C<sub>4</sub> acid intermediates<sup>8</sup>. C<sub>4</sub> photosynthesis relies on an  
47 increased importance of the BS for photosynthesis, reduced dependence on M cells, more  
48 chloroplasts in BS cells, increased proliferation of plasmodesmata between M and BS cells, and a  
49 higher vein density to increase the volume of the leaf occupied by the BS. These morphological  
50 alterations to the leaf that facilitate the C<sub>4</sub> cycle are known as Kranz anatomy<sup>9</sup>. Moreover,  
51 photosynthesis gene expression is modified such that genes encoding components of the C<sub>4</sub> and  
52 Calvin-Benson-Bassham cycles are strongly and preferentially expressed in either M or BS cells<sup>8,10</sup>.

53 Despite the complex modifications associated with C<sub>4</sub> photosynthesis, current estimates are that  
54 the C<sub>4</sub> pathway has evolved independently more than sixty times in angiosperms<sup>11</sup>, which suggests  
55 a relatively straightforward route must allow the transition from the ancestral C<sub>3</sub> to the derived C<sub>4</sub>  
56 state. Genome-wide analysis of transcript abundance in multiple C<sub>3</sub> and C<sub>4</sub> species has provided  
57 unbiased insight into processes that likely change in C<sub>4</sub> compared with C<sub>3</sub> leaves<sup>12-14</sup>. Furthermore,  
58 *cis*-elements that control expression of genes encoding the C<sub>4</sub> cycle have been documented. To  
59 date however, the regulators that recognize these motifs have not been isolated<sup>15</sup>. Despite progress  
60 in our understanding of C<sub>4</sub> photosynthesis, it is currently not possible to rationally design a C<sub>4</sub>  
61 pathway in a C<sub>3</sub> leaf.

62 When natural variation is present, it enables quantitative methods such as Genome-Wide  
63 Association Studies (GWAS) and/or the development of a mapping population. Molecular marker-  
64 trait associations on the population allow identification of the causal genes underpinning the variation,  
65 which has been used extensively to map loci responsible for numerous complex traits in plants<sup>16</sup>. If  
66 such an approach could be applied to study C<sub>4</sub> photosynthesis, then it would expedite discovery of  
67 key regulators to engineer increased photosynthetic efficiency in C<sub>3</sub> plants. Interspecific hybrids have  
68 been generated between C<sub>3</sub> and C<sub>4</sub> species of the dicotyledon *Atriplex*<sup>17</sup>. Although progeny  
69 possessed variation in C<sub>4</sub> phenotypes, specific traits showed limited penetrance and there were high  
70 rates of sterility<sup>18</sup>. In the grasses, *Alloteropsis semialata* shows natural variation in C<sub>4</sub> parameters  
71 and has been classified into C<sub>3</sub> or C<sub>4</sub> subspecies<sup>19,20</sup>, but there are currently no reports that these  
72 populations have been bred. Thus, to our knowledge there are currently no examples that variation  
73 in C<sub>4</sub> traits within a single species is sufficient to allow breeding and then molecular trait-mapping.  
74 We therefore investigated the extent to which key C<sub>4</sub> traits varied in the C<sub>4</sub> dicotyledonous  
75 *Gynandropsis gynandra*, which is a leafy green vegetable<sup>21</sup> in a clade with both C<sub>3</sub> and C<sub>4</sub> species<sup>22-</sup>  
76 <sup>24</sup>. Here we show that accessions of *G. gynandra* show significant variation in both anatomical and  
77 physiological aspects associated with C<sub>4</sub> photosynthesis. These accessions have short generation  
78 spans, are sexually compatible and produce fertile offspring. These findings indicate that in a  
79 dicotyledonous species that is phylogenetically close to the model *Arabidopsis thaliana* there is  
80 sufficient natural variation to allow the use of classical genetics to identify loci controlling the  
81 multifaceted C<sub>4</sub> syndrome.

82 Accessions of *G. gynandra* were collected from African and Asian sub-continent were used  
83 (Supplementary Table 1). DNA sequencing and phylogenetic reconstruction generated a taxonomy  
84 that was generally consistent with geographical origin but also indicated that the accession from  
85 Benin in West Africa was more like the Asian accessions than those from East Africa (Fig. 1a). These  
86 accessions displayed considerable variation in macroscopic characters associated with leaf  
87 appearance (Fig. 1b, Supplementary Fig.1a). For example, fully expanded leaflets varied in size and  
88 shape, and there was also variation in petiole length, presence of trichomes and anthocyanin  
89 pigmentation. As there was considerable macroscopic variation in leaf characteristics, we then  
90 evaluated these accessions for variation in features of Kranz anatomy. Interestingly, there were  
91 statistically significant differences in vein density (Fig. 1c&d, Supplementary Fig.1b), cross-sectional  
92 area of BS strands (Fig. 1c&e, Supplementary Fig. 1c), size of individual BS cells (Fig. 1f) and  
93 stomatal density (Fig. 1c&g). Furthermore, East African accessions showed higher vein density,  
94 reduced distance between veins, and a greater stomatal density than Asian lines (Supplementary  
95 Fig. 3a-c). Asian accessions typically had larger BS areas and cell sizes than those from the African  
96 continent (Supplementary Fig. 3d&e). Vein density was inversely correlated with BS area and BS  
97 cell size but positively with stomatal density (Supplementary Table 2). The average number of BS  
98 cells around each vein showed no statistically significant differences between lines (Supplementary  
99 Fig. 3f), but cross-sectional area of the BS and the size of individual BS cells were positively  
100 correlated ( $\rho=0.8$ ,  $P<0.0001$ ). We therefore conclude that the area of individual BS cells, rather than  
101 the number of these cells per vein bundle, drives the increased BS strand area. This suggests that  
102 genetic determinants of cell size rather than cell proliferation are involved in the variation in BS tissue  
103 in *G. gynandra*. Thus, despite the lower phenotypic variation associated with  $C_4$  compared with  $C_3$   
104 leaves<sup>25</sup>, our findings demonstrate flexibility is still possible within individual species that are fully  $C_4$ .

105 We next investigated whether differences observed in Kranz anatomy affected photosynthetic  
106 performance. For all accessions, their  $CO_2$  response curves (assimilation ( $A$ ) response to the  
107 concentration of  $CO_2$  inside the leaf  $C_i$ ) were typical of  $C_4$  plants with high carboxylation efficiencies  
108 and low  $CO_2$  compensation points  $\Gamma$  (Fig. 2a, Supplementary Fig. 4a). Although parameters  
109 associated with instantaneous gas exchange such as maximum rate of photosynthesis ( $A_{max}$ ), rate  
110 of photosynthesis under the conditions of growth ( $A_{400}$ ),  $CO_2$  carboxylation efficiencies and  $\Gamma$  showed

111 little variation between accessions (Fig. 2b-e, Supplementary Fig. 4b-e), there were statistically  
112 significant differences in transpiration (Fig. 2f), stomatal conductance (Fig. 2g) and water use  
113 efficiency *WUE* (Fig. 2h). Furthermore, there was also significant variation in the carbon isotope  
114 discrimination against  $^{13}\text{C}$  ( $\delta^{13}\text{C}$ ) in leaf dry matter (Fig. 2i), which is a measure of the efficiency of  
115 the  $\text{C}_4$  carbon pump over the life-time of the leaf. Asian accessions showed reduced discrimination  
116 against  $\delta^{13}\text{C}$  compared with East African lines (Supplementary Fig. 4i). These data therefore indicate  
117 that the accessions of *G. gynandra* possess significant variation in parameters linked to the balance  
118 between water use and photosynthesis that influenced the efficiency of the  $\text{C}_4$  cycle over the life-  
119 time of a leaf.

120 We next sought to investigate the extent to which transcript abundance of core genes of the  $\text{C}_4$   
121 cycle differed between the accessions. Interestingly, there were statistically significant differences in  
122 the abundance of transcripts encoding Phosphoenolpyruvate carboxylase (*PEPC*) which catalyses  
123 the first committed step of the  $\text{C}_4$  cycle, the BS-specific decarboxylase NAD-dependent Malic  
124 Enzyme (*NAD-ME*), the small subunit of RuBisCO (*RbcS*), and pyruvate, orthophosphate dikinase  
125 (*PPDK*) that regenerates PEP the primary acceptor of  $\text{HCO}_3^-$  (Fig. 3a,c,e,g). In all cases, these  
126 differences in  $\text{C}_4$  transcript abundance were associated with geographical location and phylogenetic  
127 position of the accessions, with Asian and West African accessions accumulating greater levels of  
128  $\text{C}_4$  transcripts than East African accessions (Fig. 3b,d,f,h). Understanding how photosynthesis  
129 enzymes become strongly expressed and patterned to either mesophyll or bundle sheath cells of  $\text{C}_4$   
130 species is a longstanding area of research. However, although progress has been made in  
131 understanding *cis*-elements responsible, there is little known about the transcription factors involved.  
132 The intraspecific variation in expression of genes encoding enzymes of the  $\text{C}_4$  cycle in *G. gynandra*  
133 therefore provides an opportunity to identify *trans*-factors important for  $\text{C}_4$  photosynthesis.

134 Despite accessions functioning with similar photosynthetic efficiencies under ambient  $\text{CO}_2$  and  
135 light conditions, when assessed by phylogenetic grouping those with more pronounced Kranz traits  
136 (e.g., larger BS tissues and lower vein densities) exhibited increased  $A_{max}$ , *WUE* and  $\delta^{13}\text{C}$   
137 (Supplementary Fig. 4c,h,i) and stronger expression of the  $\text{C}_4$  cycle (Fig. 3b,d,f,h). To summarize,  
138 compared with East African accessions, Asian and West African accessions tended to have higher  
139 *WUE*, lower density of stomata and veins, and larger BS areas and cell sizes. Lastly, consistent with

140 the higher  $\delta^{13}\text{C}$ , which is indicative of a stronger  $\text{C}_4$  cycle, the Asian and West African accessions  
141 had increased expression of genes encoding  $\text{C}_4$  enzymes (Fig. 4).

142 The considerable variation reported in this study offers a valuable germplasm resource to identify  
143 regulators of the  $\text{C}_4$  pathway and Kranz anatomy through genetic mapping. All accessions in this  
144 study hybridize easily. Emasculation and pollination need only take 15-30 seconds per flower. For  
145 example, the most divergent accessions regarding anatomy 'Malaysia-1' X 'Malawi', 'Malaysia-2' X  
146 'Malawi', and their reciprocal crosses produce an average  $52 \pm 11$  seeds per silique ( $n=6$ ), whose  
147 offspring are fully fertile. These  $\text{F}_1$  hybrid populations provide an excellent breeding foundation to  
148 delineate regulatory mechanisms, and also provide an opportunity to test whether the  $\text{C}_4$  trait is  
149 induced by a master switch<sup>26</sup>, or the action of multiple independent processes<sup>15,27</sup>. The discovery of  
150 intra-specific variation in a  $\text{C}_4$  grass would be particularly useful in mapping traits relevant to  
151 improving photosynthesis in cereals and thus introduce  $\text{C}_4$  photosynthesis into  $\text{C}_3$  crops.

152 While our understanding of the regulatory mechanisms underlying  $\text{C}_4$  metabolism is growing,  
153 there is still a significant gap in tools to expand understanding of the regulation behind Kranz  
154 anatomy and the  $\text{C}_4$  biochemical cycle. Methods such as Quantitative Trait Loci (QTL) mapping or  
155 GWAS in *G. gynandra* or in an equally diverse  $\text{C}_4$  species may provide beneficial insights for the  
156 regulation of Kranz development. Most trait variation in *G. gynandra* was associated with  
157 characteristics relating to water use that impact on carbon capture. It is noteworthy that modifications  
158 to  $\text{C}_3$  leaves considered to represent early steps on the path towards the  $\text{C}_4$  phenotype are also  
159 associated with water use rather than  $\text{CO}_2$  fixation<sup>27,28</sup>. As natural vegetation is not considered to be  
160 under strong selection pressure to optimize photosynthesis<sup>29,30</sup>, it seems likely that  $\text{C}_4$  trait variation  
161 continues to be driven by optimizing water use rather than photosynthesis *per se*.

162 **ACKNOWLEDGEMENTS**

163 We thank Frank Becker and Beatrice Landoni (Wageningen University) for providing ITS sequence  
164 data and initial information on the selected lines, Blandine Gilbert for help with image processing and  
165 James Rolfe for carbon isotope analysis. GR was supported by a Gates Cambridge Trust PhD  
166 Fellowship and PS by Advanced ERC grant 694733 Revolution to JMH.

167

168 **AUTHOR CONTRIBUTIONS**

169 GR, PS and JMH designed the study. GR, PS, TAR and EODS carried out experimental work. GR,  
170 PS, TAR, MES and JMH wrote the manuscript.

171

172 **MATERIALS AND METHODS**

173 *Plant accessions and growth conditions*

174 A selection of nine diverse accessions of *G. gynandra* were made from a larger germplasm  
175 collection based on initial phenotypic and genetic screening. Five accessions were from Africa and  
176 four from Asia (Supplementary Table 1, materials available on request from MES). Plants from all *G.*  
177 *gynandra* accessions were grown under identical conditions prior to sampling. After germination, all  
178 seeds were planted in 5:1 F2 compost (Levington Advance, UK) to fine vermiculite premixed with  
179 0.17 g/L insecticide (Imidasect 5GR, Fargro, UK). Seedlings were kept in a growth cabinet at 350  
180  $\mu\text{mol photons m}^{-2} \text{s}^{-1}$  light with a 16 h photoperiod, at 25 °C, 60% relative humidity (RH), ambient  
181  $[\text{CO}_2]$ . A single dose of 3 mL/L slow release 17N-9P-11K fertilizer (All Purpose Continuous Release  
182 Plant Food, Miracle-Gro, UK) was applied after 1.5 weeks. Plants for physiological measurements  
183 were grown under identical conditions to those for Kranz measurements for the first three weeks,  
184 after which they were re-planted in 13 cm<sup>3</sup> pots with 5:1 M3 soil (Levington Advance, UK) to medium  
185 vermiculite soil mixture and moved to a growth room set to 23 °C, 60% RH, ambient  $[\text{CO}_2]$ , 350  $\mu\text{mol}$   
186  $\text{photons m}^{-2} \text{s}^{-1}$  PAR with a 16 h photoperiod.

187

188 *Preparation of leaf tissue sections*

189 Three weeks after germination, tissue was harvested from healthy plants from the centre trifoliate  
190 leaves of the second pair of fully expanded true leaves. A 3 mm<sup>2</sup> rectangle was cut from the leaf



191 adjacent to the midvein with a razor blade for transverse sections. Two slightly larger rectangles  
192 were cut from identical regions for paradermal sectioning and qRT-PCR analysis.

193 For transverse sections, leaf tissue in plastic cuvettes were submerged in a 4% paraformaldehyde  
194 in PBS solution (Sigma-Aldrich, St. Louis, MO, USA), placed in a vacuum chamber for 1 h, and  
195 incubated at 4 °C overnight for fixing. Cuvettes then underwent an ethanol dehydration series from  
196 30% to 90% (v/v) ethanol solutions (Thermo Fisher Scientific, Waltham, MA, USA) in 10% (v/v)  
197 increments for 45 minutes each at 4 °C with a final overnight treatment at 4 °C in 95% ethanol with  
198 0.1% eosin dye solution (Sigma-Aldrich, St. Louis, MO, USA). The dye solution was washed thrice  
199 with 100% (v/v) ethanol at room temperature. The samples were embedded in resin in accordance  
200 with the Technovit 7100 (Kulzer GmbH, Wehrheim, Germany) manufacturer's protocol. Hardened  
201 resin blocks were cut with a manual rotary microtome (Thermo Fisher Scientific, Waltham, MA, USA).  
202 Sections were placed on microscope slides and stained with 0.1% (w/v) toluidine blue solution  
203 (Sigma-Aldrich, St. Louis, MO, USA) prior to imaging on a light microscope.

204 For paradermal sections, fresh tissue samples were placed in plastic cuvettes and incubated in  
205 3:1 100% (v/v) ethanol to acetic acid solution before treatment with 70% (v/v) ethanol solution  
206 (refreshed once) at 37 °C overnight. To clear the samples, cuvettes were submerged in 5% NaOH  
207 solution for three hours at 37 °C. After storage in 70% ethanol solution, the samples were stained  
208 with 95% (v/v) ethanol and 0.1% (v/v) eosin dye solution (Sigma-Aldrich, St. Louis, MO, USA).  
209 Samples were stored overnight at 4 °C and washed with 70% (v/v) ethanol thrice before transfer to  
210 slides for imaging. To determine stomatal density impressions of the abaxial epidermis of each  
211 central leaflet were generated by applying a thin coat of transparent nail varnish (Boots, Nottingham,  
212 UK). After drying, the varnish was peeled off and mounted onto glass slide for imaging.

213

#### 214 *Measurement of Kranz anatomy traits*

215 Slides of all leaf sections were imaged with an Olympus BX41 light microscope with a mounted  
216 Micropublisher 3.3 RTV camera (Q Imaging, Surrey, BC, Canada). Images were captured with Q-  
217 Capture Pro 7 software, and measurements were analyzed with the software ImageJ<sup>31</sup>. To maximize  
218 comparability, strict criteria were applied for all image analyses. Microscopy of transverse leaf  
219 sections was used to quantify the BS both in terms of average BS tissue area (the total cross-



220 sectional area of all BS cells immediately surrounding a vein) and BS cell size (the average cross-  
221 sectional area of individual BS cells around the vein). To quantify BS tissue area, the freehand  
222 selection tool was used to subtract the integrated area of each vein from the integrated area of all  
223 BS cells in direct contact with the vein on images with 200X total magnification. This value was  
224 divided by the number of BS cells in each vein bundle to obtain the average BS cell size. For inter-  
225 vein distance (the distance between the centers of adjacent veins in transverse sections), only vein  
226 bundles were measured for which the following criteria did not apply: wide (indicates branching) or  
227 extremely large veins, veins with distorted BS cells due to contact with adjacent BS tissues (indicates  
228 merging), veins with damaged BS cells. The line selection tool was used to measure the linear  
229 distance between the centers of adjacent veins on images with 40X total magnification. Vein density  
230 (vein length per unit area of leaf) was quantified on paradermal sections on images with 100X total  
231 magnification. Slides were imaged with the same microscopy equipment as transverse sections but  
232 set to Ph3 (phase contrast). Three images (from three different leaves per plant) were randomly  
233 selected for measurement. The freehand line tool was used to trace all veins (both major and minor)  
234 along their center. As it was not possible to trace all veins in an image simultaneously, individual  
235 vein sections were progressively measured without overlap and the individual lengths summed. The  
236 total vein length was divided by the image area to obtain the density. Stomatal density (the number  
237 of stomata per unit area of leaf) was measured on three subsampled leaves from three random  
238 plants on images with 200X total magnification. The total number of stomata were divided by the  
239 image area to obtain the density.

240

#### 241 *Photosynthetic performance*

242 A LI-6800 portable photosynthesis infrared gas analyzer (IRGA) system (LI-COR, Lincoln, NE,  
243 USA) equipped with a multiphase flash fluorimeter was used to assess physiological differences for  
244 photosynthetic parameters between *G. gynandra* accessions. All physiological measurements were  
245 performed on the central leaflet of five-week old plants with three biological replicates. For stomatal  
246 conductance, transpiration ( $E$ ), and assimilation ( $A_{400}$ ), measurements were taken during ambient  
247 conditions of growth (400 ppm atmospheric  $[\text{CO}_2]$ ,  $C_a$ ; photosynthetic photon flux density (PPFD)  
248  $350 \mu\text{mol m}^{-2}\text{s}^{-1}$ ). Water use efficiency ( $WUE$ ) was defined as  $A_{400}/E$ . A combination chlorophyll

249 fluorescence and assimilation / intracellular CO<sub>2</sub> concentration ( $A/C_i$ ) curve was measured for three  
250 plants from each accession. Atmospheric CO<sub>2</sub> ( $C_a$ ) reference values were: 400, 400, 300, 200, 100,  
251 50, 25, 400, 400, 400, 600, 800, 1000, 1200, 400 ppm, with a saturating rectangular pulse of 12,000  
252  $\mu\text{mol m}^{-2}\text{s}^{-1}$  at each reference point. Otherwise, measurements were made at a PPFD of 2000  $\mu\text{mol}$   
253  $\text{m}^{-2}\text{s}^{-1}$ , 23 °C and 60% RH at each reference point. All leaves covered the full area of the  
254 fluorimeter/IRGA cuvette. Measurements were carried out on consecutive days between one and  
255 eight hours post dawn, measuring one random plant from each accession per day. Maximal  
256 assimilation ( $A_{max}$ ) was calculated as the asymptote of the  $A/C_i$  response curve. The CO<sub>2</sub>  
257 compensation point ( $I$ ) was calculated from the regression of  $A$  and  $C_i$  measurements ranging  
258 between  $C_a$  values of 200 and 25 ppm at  $A = 0$ . Adjusted  $R^2$  values for the regression line ranged  
259 between 0.9932 and 0.9967. Carboxylation efficiency was calculated as the partial derivative  
260  $\frac{\partial A}{\partial C_i}$  at  $A = 0$ . Stable carbon isotope ( $\delta^{13}\text{C}$ ) analysis was performed according to methods previously  
261 described<sup>32</sup> on three biological replicates per accession with 500  $\mu\text{g}$  of dried leaf tissue.

262

### 263 *Statistical Analysis*

264 For all tests, individual plants were considered experimental units in a complete randomized  
265 design. Data were analyzed in SAS (University Version, SAS Institute, Cary, NC, USA) and in R  
266 (Version 3.4.2, R Studio, Inc., Boston, MA, USA). A One-Way Analysis of Variance (ANOVA)  
267 compared all means from anatomical and physiological measurements among *G. gynandra*  
268 accessions and a Student's t-test was used to compare means of accessions by continent ( $\alpha=0.05$ ).  
269 Null hypotheses were rejected for specific ANOVA or t-tests for any population with  $P$  value  $\leq 0.05$ .  
270 Levene's Test was used to evaluate homoscedasticity<sup>33</sup>. Duncan's Multiple Range post-hoc test was  
271 used for mean separation on accessions ( $\alpha=0.05$ ) with statistically significant ANOVAs<sup>34</sup>. Pearson  
272 product-moment correlation coefficients were calculated to find associations among features of  
273 Kranz traits<sup>35</sup>.

274

### 275 *Analysis of transcript abundance*

276 Leaf tissue samples for RNA extraction were harvested simultaneously with samples for Kranz trait  
277 measurements. The fresh samples were immediately frozen with liquid nitrogen and stored at -80 °C.  
278 Total RNA was extracted from three tissue samples per accession with a RNeasy Mini Kit (QIAGEN,  
279 Hilden, DE) according to the manufacturer's instructions. An On-Column DNase Digestion protocol  
280 was applied to remove genomic DNA contamination (QIAGEN, Hilden, DE) before cDNA was  
281 synthesized with Invitrogen Superscript II RT enzyme according to the manufacturer's instructions  
282 (Thermo Fisher Scientific Inc., Waltham, MA, USA). All cDNA samples were stored at -20 °C before  
283 qRT-PCR. Primers were designed for Quantitative PCR of C<sub>4</sub> cycle genes *PEPC*, *NAD-ME*, *RbcS*  
284 and *PPDK* (Supplementary Table 3), and reactions carried out as reported previously<sup>36</sup> on three  
285 biological and three technical replicates.

286 **References**

- 287 1. Hibberd, J. M., Sheehy, J. E. & Langdale, J. A. Using C<sub>4</sub> photosynthesis to increase the  
288 yield of rice—rationale and feasibility. *Curr. Opin. Plant Biol.* **11**, 228–231 (2008).
- 289 2. von Caemmerer, S., Quick, W. P. & Furbank, R. T. The development of C<sub>4</sub> rice: current  
290 progress and future challenges. *Science* **336**, 1671–1672 (2012).
- 291 3. Hatch, M. D. C<sub>4</sub> photosynthesis: a unique blend of modified biochemistry, anatomy and  
292 ultrastructure. *Biochim. Biophys. Acta - Rev. Bioenerg.* **895**, 81–106 (1987).
- 293 4. Kajala, K. *et al.* Strategies for engineering a two-celled C<sub>4</sub> photosynthetic pathway into rice.  
294 *J. Exp. Bot.* **62**, 3001–3010 (2011).
- 295 5. Schuler, M. L., Mantegazza, O. & Weber, A. P. M. Engineering C<sub>4</sub> photosynthesis into C<sub>3</sub>  
296 chassis in the synthetic biology age. *Plant J.* **87**, 51–65 (2016).
- 297 6. Bowes, G., Ogren, W. L. & Hageman, R. H. Phosphoglycolate production catalyzed by  
298 ribulose diphosphate carboxylase. *Biochem. Biophys. Res. Commun.* **45**, 716–722 (1971).
- 299 7. Sharkey, T. D. Estimating the rate of photorespiration in leaves. *Physiol. Plant.* **73**, 147–152  
300 (1988).
- 301 8. Garner, D. M. G., Mure, C. M., Yerramsetty, P. & Berry, J. O. Kranz Anatomy and the C<sub>4</sub>  
302 Pathway. in *eLS*, John Wiley & Sons, Ltd, (2001).
- 303 9. Lundgren, M. R., Osborne, C. P. & Christin, P.-A. Deconstructing Kranz anatomy to  
304 understand C<sub>4</sub> evolution. *J. Exp. Bot.* **65**, 3357–3369 (2014).
- 305 10. Marshall, D. M. *et al.* *Cleome*, a genus closely related to *Arabidopsis*, contains species  
306 spanning a developmental progression from C<sub>3</sub> to C<sub>4</sub> photosynthesis. *Plant J.* **51**, 886–896  
307 (2007).
- 308 11. Sage, R. F. A portrait of the C<sub>4</sub> photosynthetic family on the 50th anniversary of its  
309 discovery: species number, evolutionary lineages, and Hall of Fame. *J. Exp. Bot.* (2016).
- 310 12. Aubry, S., Kelly, S., Kümpers, B. M. C., Smith-Unna, R. D. & Hibberd, J. M. Deep

- 311 Evolutionary Comparison of Gene Expression Identifies Parallel Recruitment of Trans-  
312 Factors in Two Independent Origins of C<sub>4</sub> Photosynthesis. *PLoS Genet* **10**, e1004365  
313 (2014).
- 314 13. Lauterbach, M. *et al.* De novo Transcriptome Assembly and Comparison of C<sub>3</sub>, C<sub>3</sub>-C<sub>4</sub>, and  
315 C<sub>4</sub> Species of Tribe Salsoleae (Chenopodiaceae). *Frontiers in Plant Science* **8**, 1939  
316 (2017).
- 317 14. Bräutigam, A., Schliesky, S., Külahoglu, C., Osborne, C. P. & Weber, A. P. M. Towards an  
318 integrative model of C<sub>4</sub> photosynthetic subtypes: insights from comparative transcriptome  
319 analysis of NAD-ME, NADP-ME, and PEP-CK C<sub>4</sub> species. *J. Exp. Bot.* **65**, 3579–3593  
320 (2014).
- 321 15. Reeves, G., Grangé-Guermente, M. J. & Hibberd, J. M. Regulatory gateways for cell-specific  
322 gene expression in C<sub>4</sub> leaves with Kranz anatomy. *J. Exp. Bot.* **68**, 107–116 (2017).
- 323 16. Mauricio, R. Mapping quantitative trait loci in plants: uses and caveats for evolutionary  
324 biology. *Nat. Rev. Genet.* **2**, 370 (2001).
- 325 17. Oakley, J. C., Sultmanis, S., Stinson, C. R., Sage, T. L. & Sage, R. F. Comparative studies  
326 of C<sub>3</sub> and C<sub>4</sub> *Atriplex* hybrids in the genomics era: physiological assessments. *J. Exp. Bot.*  
327 **65**, 3637–3647 (2014).
- 328 18. Brown, H. R. & Bouton, J. H. Physiology and Genetics of Interspecific Hybrids Between  
329 Photosynthetic Types. *Annu. Rev. Plant Physiol. Plant Mol. Biol.* **44**, 435–456 (1993).
- 330 19. Ueno, O. & Sentoku, N. Comparison of leaf structure and photosynthetic characteristics of  
331 C-3 and C-4 *Alloteropsis semialata* subspecies. *Plant Cell Environ.* **29**, 257–268 (2006).
- 332 20. Lundgren, M. R. *et al.* Evolutionary implications of C<sub>3</sub>-C<sub>4</sub> intermediates in the grass  
333 *Alloteropsis semialata*. *Plant. Cell Environ.* **39**, 1874–1885 (2016).
- 334 21. Sogbohossou, E. O. D. *et al.* A roadmap for breeding orphan leafy vegetable species: a  
335 case study of *Gynandropsis gynandra* (Cleomaceae). *Hortic. Res.* **5**, 2 (2018).
- 336 22. Feodorova, T. A., Voznesenskaya, E. V, Edwards, G. E. & Roalson, E. H. Biogeographic

- 337 patterns of diversification and the origins of C<sub>4</sub> in *Cleome* (Cleomaceae). *Syst. Bot.* **35**, 811–  
338 826 (2010).
- 339 23. Marshall, D. M. *et al.* *Cleome*, a genus closely related to Arabidopsis, contains species  
340 spanning a developmental progression from C<sub>3</sub> to C<sub>4</sub> photosynthesis. *Plant J.* **51**, 886–896  
341 (2007).
- 342 24. Brown, N. J., Parsley, K. & Hibberd, J. M. The future of C<sub>4</sub> research - maize, *Flaveria* or  
343 *Cleome*? *Trends Plant Sci.* **10**, 215–221 (2005).
- 344 25. Sage, R. F. & McKown, A. D. Is C<sub>4</sub> photosynthesis less phenotypically plastic than C<sub>3</sub>  
345 photosynthesis?. *J. Exp. Bot.* **57**, 303–317 (2006).
- 346 26. Westhoff, P. & Gowik, U. Evolution of C<sub>4</sub> Photosynthesis—Looking for the Master Switch.  
347 *Plant Physiol.* **154**, 598 LP-601 (2010).
- 348 27. Williams, B. P., Johnston, I. G., Covshoff, S. & Hibberd, J. M. Phenotypic landscape  
349 inference reveals multiple evolutionary paths to C<sub>4</sub> photosynthesis. *Elife* **2**, e00961 (2013).
- 350 28. Sage, R. F. Tansley review: The evolution of C<sub>4</sub> photosynthesis. *New Phytol* **161**, 30 (2004).
- 351 29. Long, S. P., Marshall-Colon, A. & Zhu, X.-G. Meeting the Global Food Demand of the Future  
352 by Engineering Crop Photosynthesis and Yield Potential. *Cell* **161**, 56–66 (2015).
- 353 30. Ort, D. R. *et al.* Redesigning photosynthesis to sustainably meet global food and bioenergy  
354 demand. *Proc. Natl. Acad. Sci.* **112**, 8529–8536 (2015).
- 355 31. Schneider, C. A., Rasband, W. S. & Eliceiri, K. W. NIH Image to ImageJ: 25 years of image  
356 analysis. *Nat. Methods* **9**, 671–675 (2012).
- 357 32. Royles, J. *et al.* Moss stable isotopes (carbon-13, oxygen-18) and testate amoebae reflect  
358 environmental inputs and microclimate along a latitudinal gradient on the Antarctic  
359 Peninsula. *Oecologia* **181**, 931–945 (2016).
- 360 33. Levene, H. in *Contributions to Probability and Statistics: Essays in Honor of Harold Hotelling*  
361 278–292, Stanford University Press, (1960).

- 362 34. Duncan, D. B. Multiple Range and Multiple F Tests. *Biometrics* **11**, 1–42 (1955).
- 363 35. Pearson, K. Notes on regression and inheritance in the case of two parents. *Proc. R. Soc.*  
364 *London* **58**, 240–242 (1895).
- 365 36. Burgess, S. J. *et al.* Ancestral light and chloroplast regulation form the foundations for C<sub>4</sub>  
366 gene expression. *Nat. Plants* **2**, 16161 (2016).
- 367



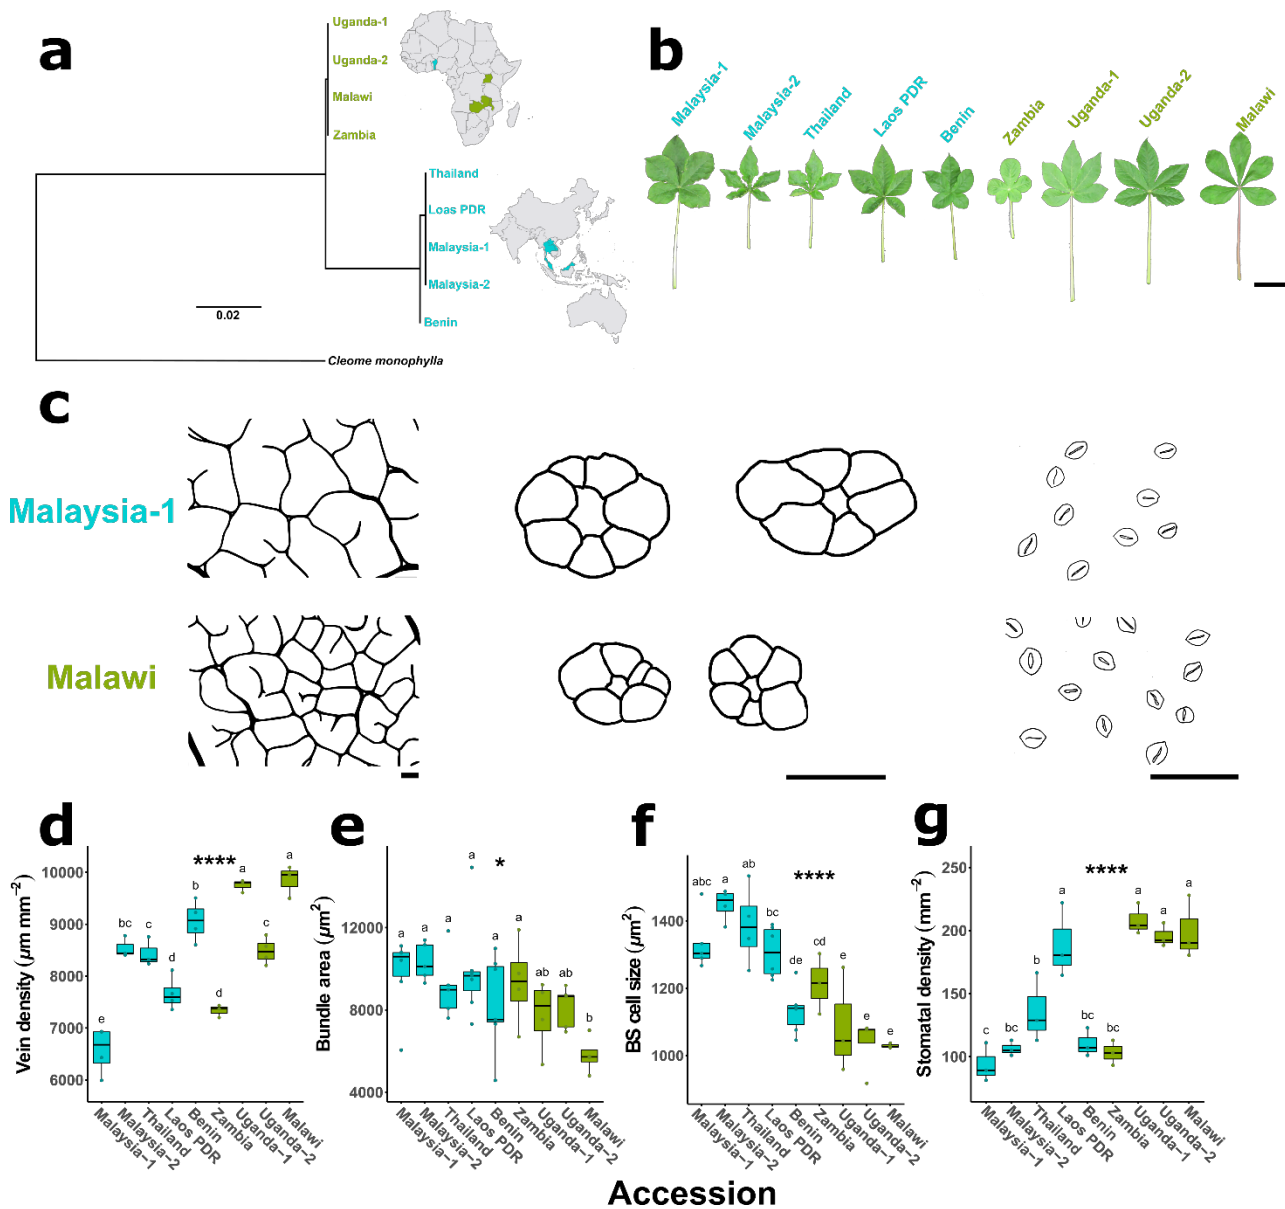

368

369 **Figure 1. Natural variation in Kranz anatomy features among a diverse panel of *G. gynandra***  
 370 **(C<sub>4</sub>) accessions.** **a**, Geographic and phylogenetic relationships for nine accessions from seven  
 371 countries across Africa and Asia. **b**, variation in fully mature whole leaves of six-week old plants  
 372 (scale = 5 cm). **c**, variation in venation, bundle sheath ring, bundle sheath cell size, and stomata  
 373 traces of fully mature leaves for two extreme examples (scale = 100  $\mu\text{m}$ ). **d**, vein density, **e**, bundle  
 374 area, **f**, bundle sheath cell size, **g**, and stomata density for all accessions. Asterisks indicate  
 375 significant differences between accessions (one-way ANOVA, \* $P < 0.05$ , \*\* $P < 0.01$ , \*\*\* $P < 0.001$ ,  
 376 \*\*\*\* $P < 0.0001$ ). Letters above individual box-scatter plots indicate significant groupings according to  
 377 Duncan's Multiple Range Test ( $\alpha = 0.05$ ).

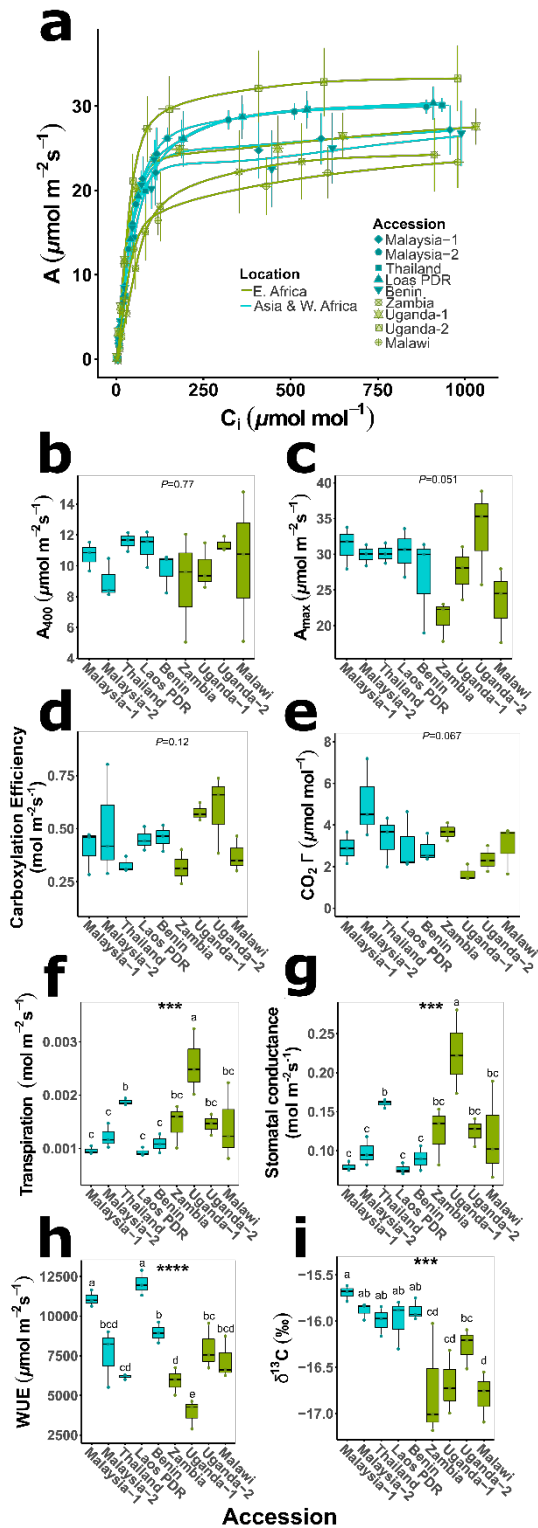

378

379 **Figure 2. Physiological variation for photosynthetic gas exchange parameters among a**  
 380 **diverse panel of *G. gynandra* ( $C_4$ ) accessions. a**, assimilation ( $A$ ) versus internal  $CO_2$  ( $C_i$ )  
 381 response curve. **b-i**, differences among accessions for ambient assimilation ( $A_{400}$ ) rates (400 ppm  
 382 atmospheric  $[CO_2]$ ,  $C_a$ ; PPFD  $350 \mu mol m^{-2} s^{-1}$ ), maximal assimilation ( $A_{max}$ ) rates (1200ppm  $C_a$ ,  
 383 PPFD  $2000 \mu mol m^{-2} s^{-1}$ ),  $CO_2$  compensation point ( $\Gamma$ ), carboxylation efficiency, transpiration,  
 384 stomatal conductance, water use efficiency ( $WUE$ ), and carbon isotope composition ( $\delta^{13}C$ ),  
 385 respectively. Asterisks indicate significant differences between accessions (one-way ANOVA,  
 386  $*P<0.05$ ,  $**P<0.01$ ,  $***P<0.001$ ,  $****P<0.0001$ ). Letters above individual box-scatter plots indicate  
 387 significant groupings according to Duncan's Multiple Range Test ( $\alpha=0.05$ ),  $n=3$ .

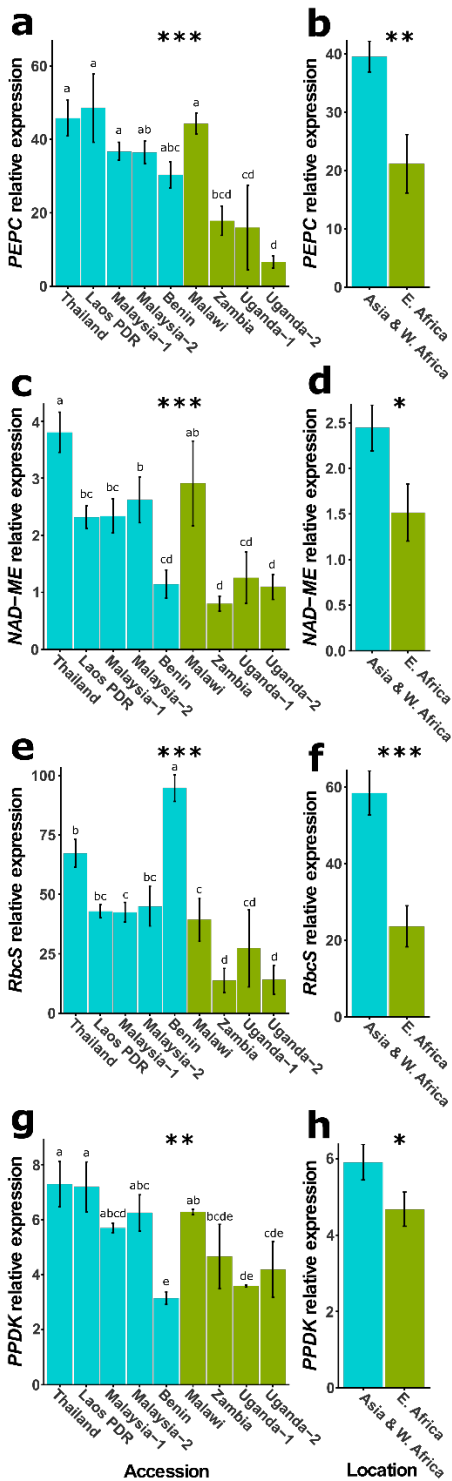

388

389 **Figure 3. Transcript abundance differences for key enzymes in the C<sub>4</sub> cycle among diverse**  
 390 ***G. gynandra* accessions.** Gene expression differences were determined by qRT-PCR. Gene  
 391 abbreviations: PEPC, PHOSPHOENOLPYRUVATE CARBOXYLASE 2; NAD-ME, NAD-  
 392 DEPENDENT MALIC ENZYME 2; RbcS, RIBULOSE-1,5-BISPHOSPHATE  
 393 CARBOXYLASE/OXYGENASE SMALL SUBUNIT 1A; PPDK, PYRUVATE, ORTHOPHOSPHATE  
 394 DIKINASE. Asterisks indicate significant differences (\* $P < 0.05$ , \*\* $P < 0.01$ , \*\*\* $P < 0.001$ ,  
 395 \*\*\*\* $P < 0.0001$ ), **a, c, e, g**, among accessions (one-way ANOVA,  $n=3$ ) or **b, d, f, h**, among  
 396 phylogenetic cluster (Student's t-test,  $n=15$  for Asia and W. Africa,  $n=12$  for E. Africa). Letters  
 397 above individual bar charts indicate significant groupings among accessions according to Duncan's  
 398 Multiple Range Test ( $\alpha=0.05$ ),  $n=3$ .

399

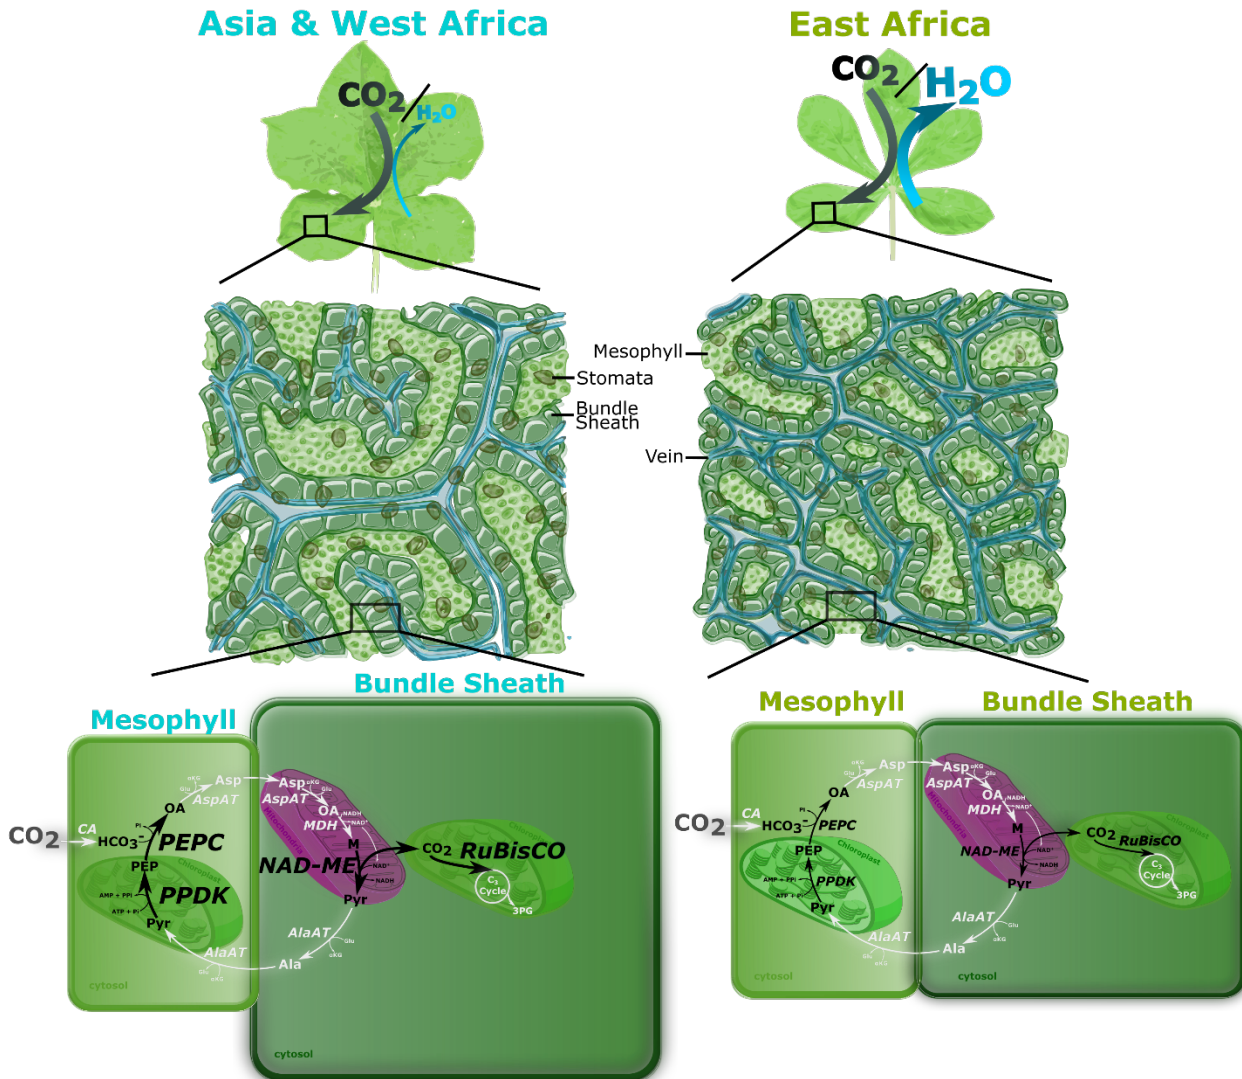

400 **Figure 4. Asian and African *G. gynandra* accessions exhibit many differences in anatomy,**  
 401 **physiology and C<sub>4</sub> enzyme expression patterns.** All C<sub>4</sub> enzymes investigated had differential  
 402 transcript abundance and are indicated by black arrows, where larger letters represent higher  
 403 relative transcript abundance. Gene abbreviations: *PEPC*, PHOSPHOENOLPYRUVATE  
 404 CARBOXYLASE 2; *NAD-ME*, NAD-DEPENDENT MALIC ENZYME 2; *RbcS*, RIBULOSE-1,5-  
 405 BISPHOSPHATE CARBOXYLASE/OXYGENASE SMALL SUBUNIT 1A; *PPDK*,  
 406 PYRUVATE, ORTHOPHOSPHATE DIKINASE. Enzymatic steps in white were not investigated.

407

408

409

410

411

412

413

## Supplementary Figures

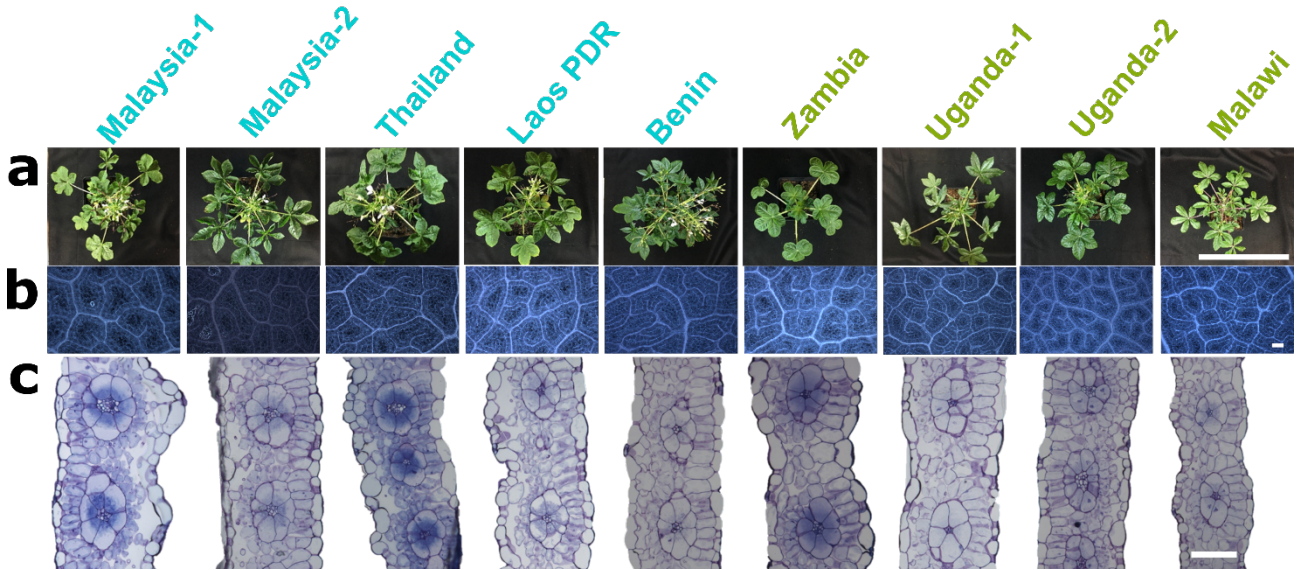

414

415 **Supplementary Figure 1. Representative images for macroscopic and microscopic variation**  
 416 **in leaf anatomy across a panel of *G. gynandra* accessions. a**, four-week old whole plants  
 417 (scale = 30 cm), **b**, paradermal view of leaf venation under light phase contrast microscopy, **c**,  
 418 transverse leaf sections (scale = 100  $\mu$ m).

419

420

421 **Supplementary Table 1. Accessions of *G. gynandra* investigated and their source regions.**

| Accession  | Temporary No. <sup>1</sup> | VI No. <sup>1</sup> | Continent of Origin | Country of Origin                | Source                       |
|------------|----------------------------|---------------------|---------------------|----------------------------------|------------------------------|
| Malaysia-1 | TOT7199                    | VI055200            | Asia                | Malaysia                         | Prof. Eric Schranz           |
| Malaysia-2 | N/A                        | N/A                 | Asia                | Malaysia                         | B&T World Seeds <sup>2</sup> |
| Thailand   | TOT4937                    | VI048669            | Asia                | Thailand                         | Prof. Eric Schranz           |
| Laos PDR   | TOT7441                    | VI055576            | Asia                | Lao People's Democratic Republic | Prof. Eric Schranz           |
| Benin      | ODS-15-020                 | N/A                 | Africa              | Benin                            | Prof. Eric Schranz           |
| Zambia     | TOT8933                    | VI059557            | Africa              | Zambia                           | Prof. Eric Schranz           |
| Uganda-1   | TOT8889                    | VI059513            | Africa              | Uganda                           | Prof. Eric Schranz           |
| Uganda-2   | TOT8887                    | VI059511            | Africa              | Uganda                           | Prof. Eric Schranz           |
| Malawi     | TOT8918                    | VI059542            | Africa              | Malawi                           | Prof. Eric Schranz           |

422 <sup>1</sup> Identification codes from the AVGRIS (AVRDC's Vegetable Genetic Resources Information  
 423 System) database, <http://seed.worldveg.org/>. <sup>2</sup> Available from B&T World Seeds, <http://b-and-t-world-seeds.com/>

425

426



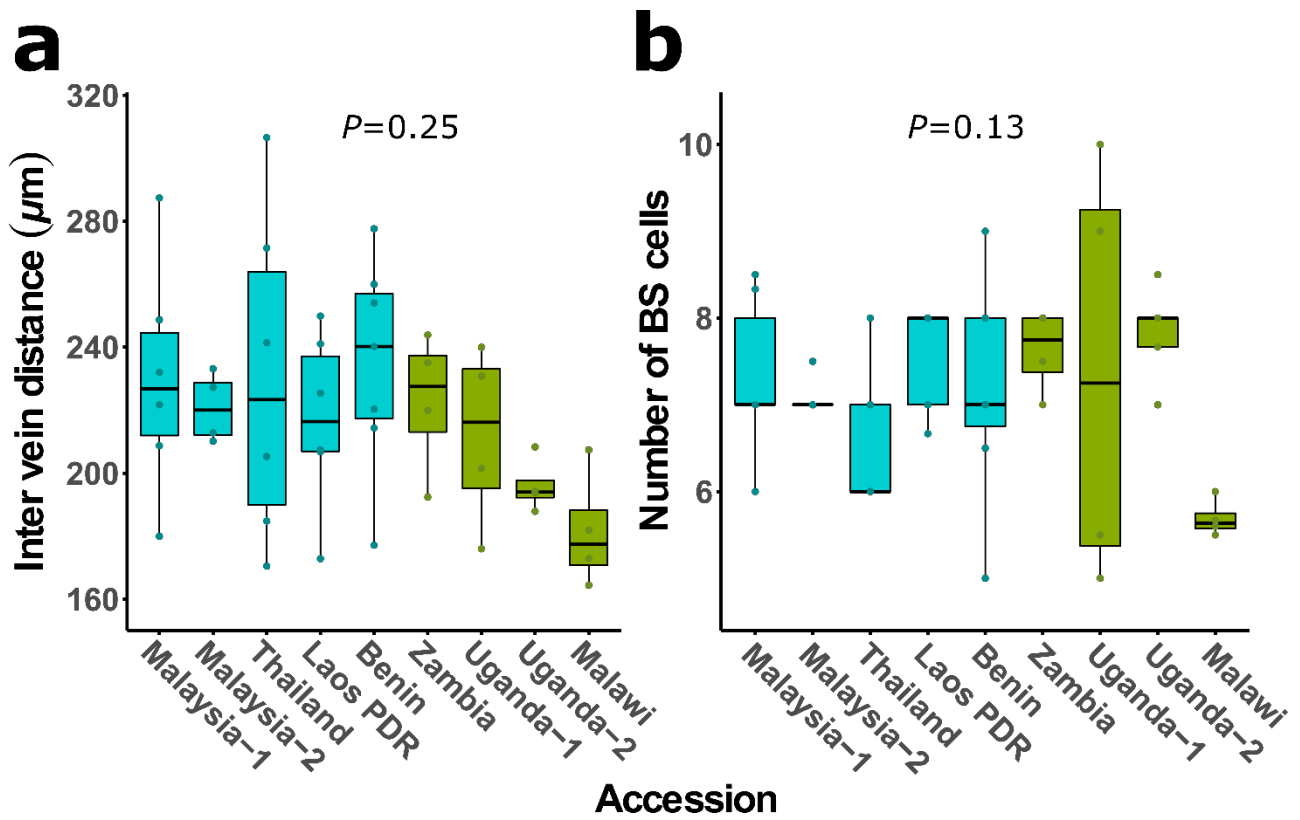

427

428 **Supplementary Figure 2. Non-variable features of Kranz anatomy among accessions. a,**  
429 **Inter-vein distance, b, the number of bundle sheath (BS) cells in each BS ring.  $P$ -value is indicated**  
430 **for one-way ANOVA.**

431

432

433

434

435

436

437

438

439

440

441

442

443

444

445

446

447

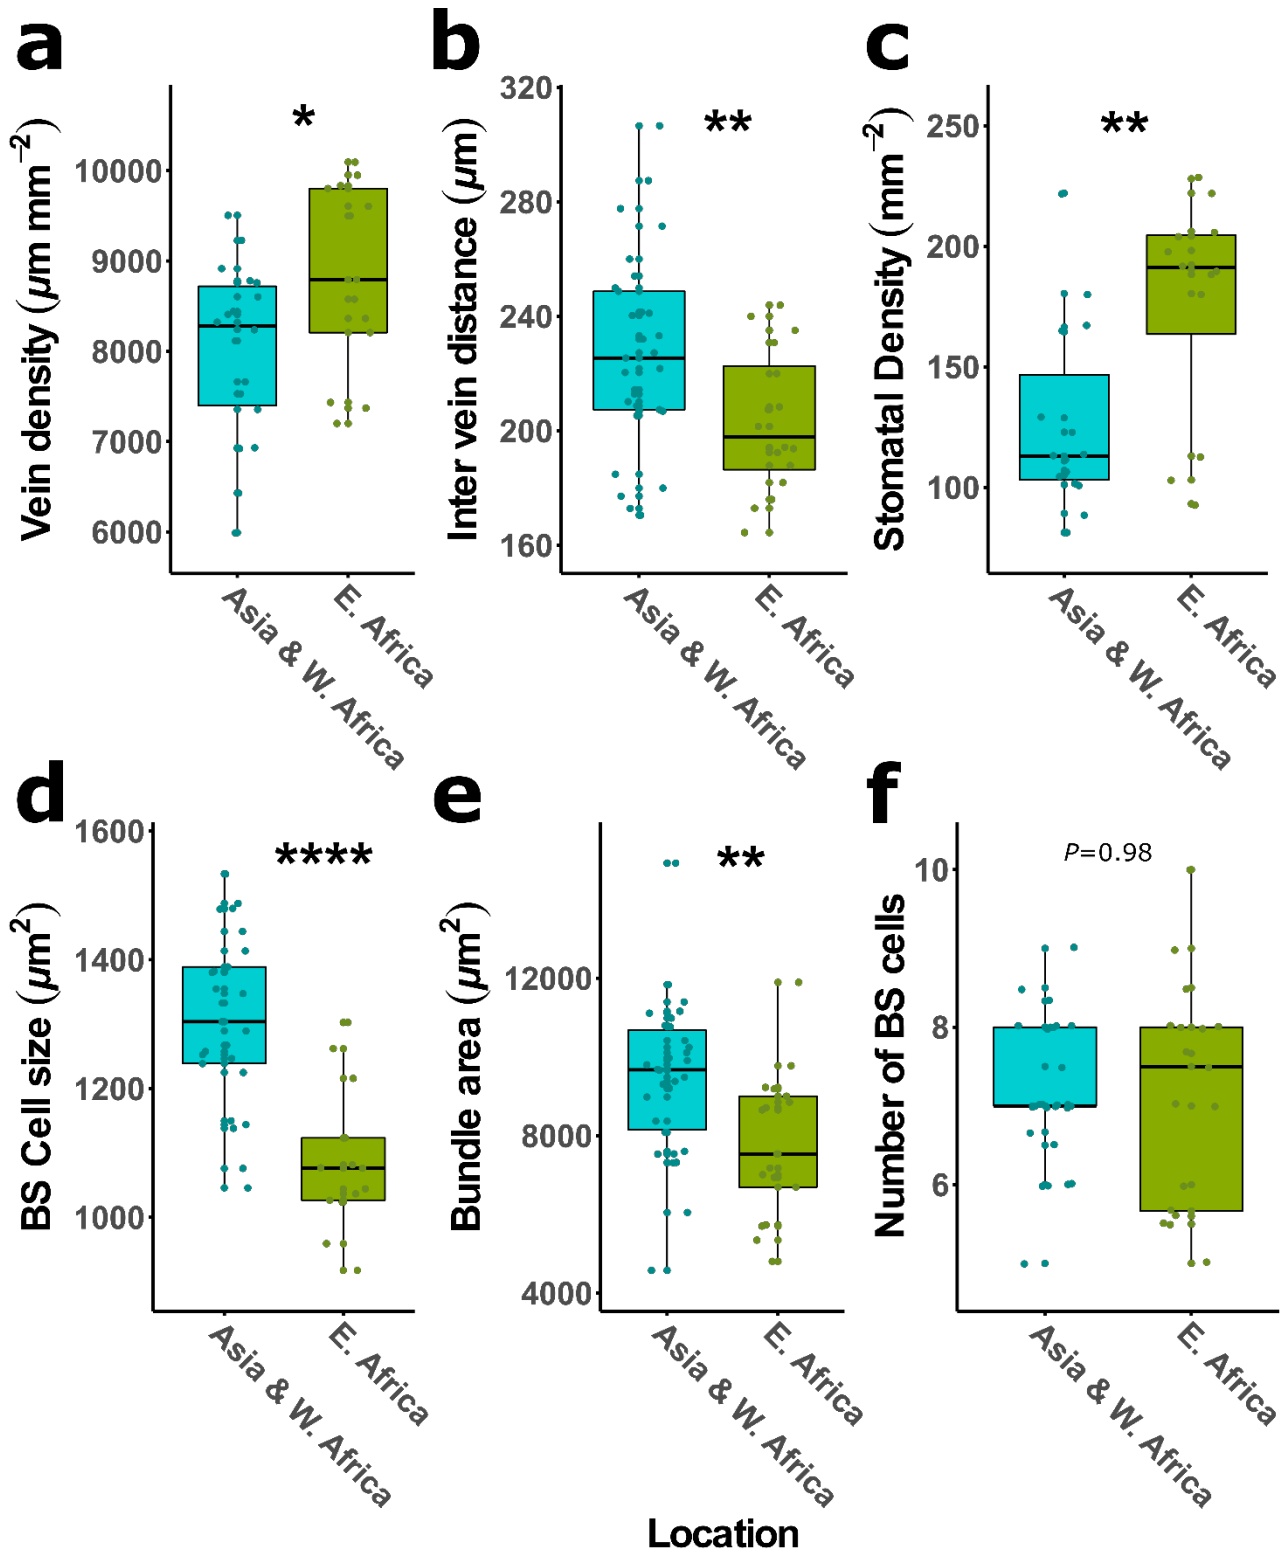

448 **Supplementary Figure 3. Natural variation in features in Kranz anatomy between Asian and**  
 449 **West African accessions compared to East African accessions of *G. gynandra*.** a-f, Vein  
 450 density, inter-vein distance, average stomatal density, average bundle sheath (BS) cell size, BS  
 451 area, and number of BS cells per bundle. Asterisks indicate significant differences between  
 452 accessions by phylogenetic relatedness (Student's t-test, \* $P < 0.05$ , \*\* $P < 0.01$ , \*\*\* $P < 0.001$ ,  
 453 \*\*\*\* $P < 0.0001$ ).



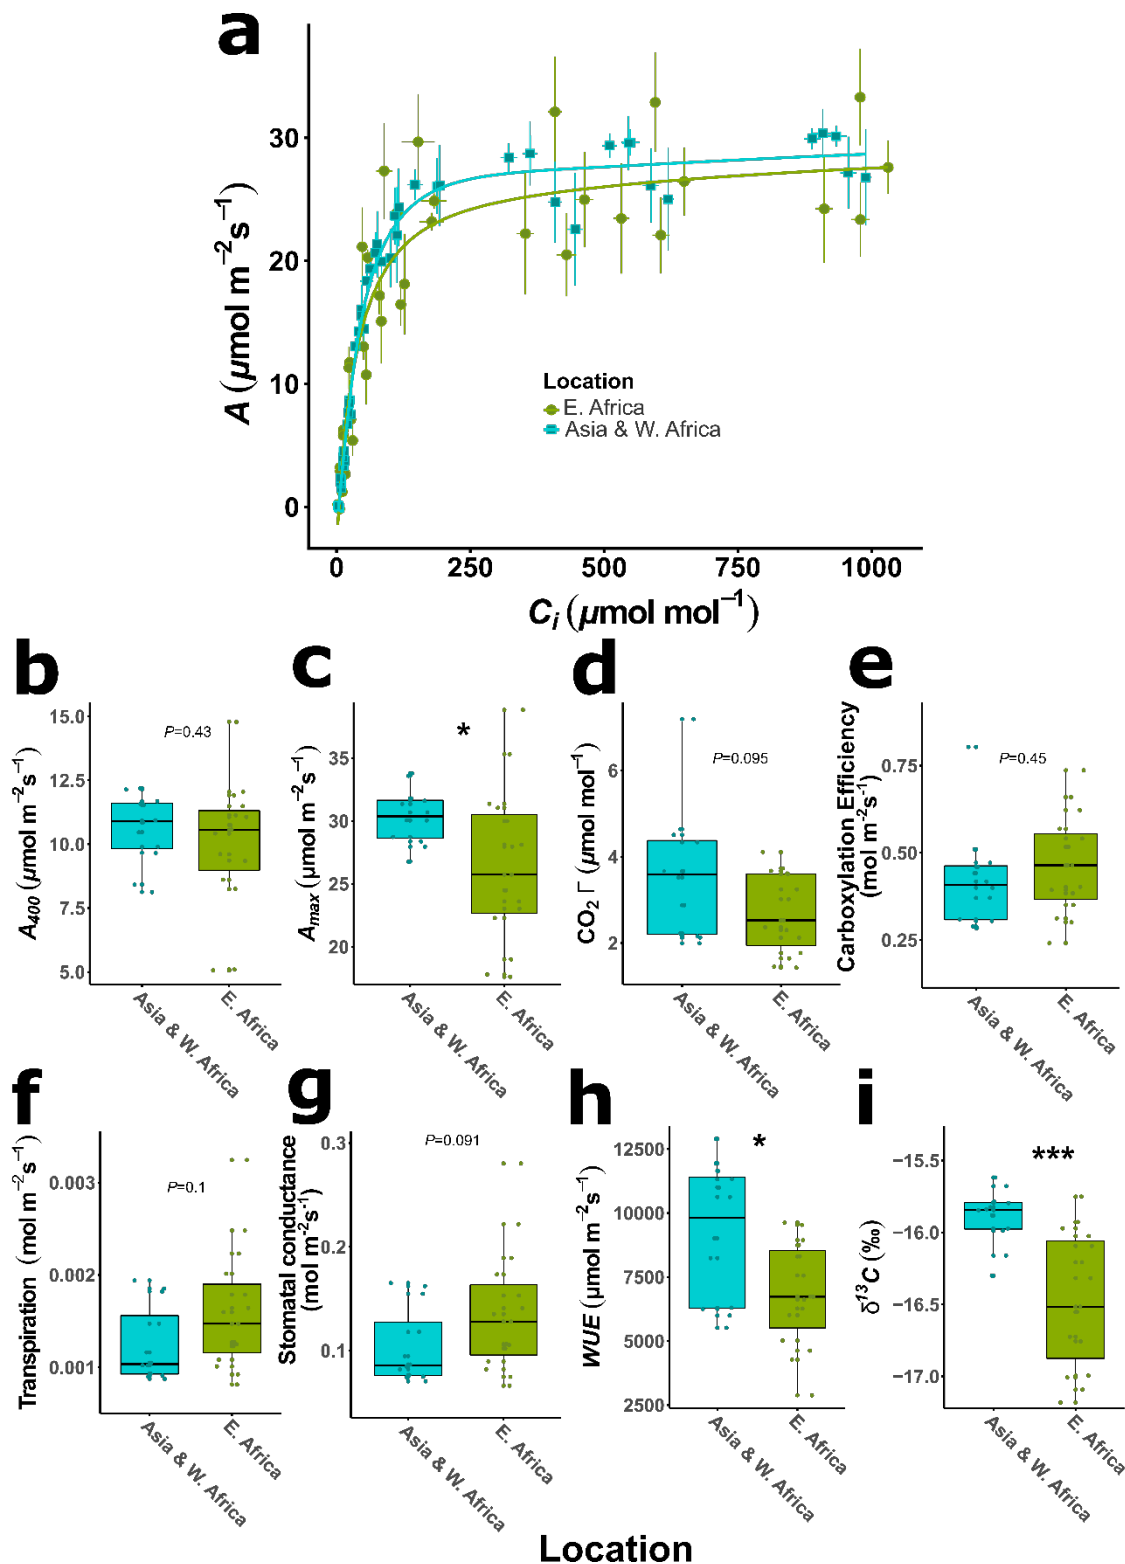

454

455 **Supplementary Figure 4. Physiological variation for photosynthetic gas exchange**  
 456 **parameters between Asian and West African accessions compared to East African**  
 457 **accessions of *G. gynandra*.** **a**, assimilation ( $A$ ) versus internal  $\text{CO}_2$  ( $C_i$ ) curve. **b-i**, differences  
 458 among accessions for ambient assimilation ( $A_{400}$ ) rates (PPFD  $350 \mu\text{mol m}^{-2}\text{s}^{-1}$ ,  $400 \text{ ppm}$   
 459 atmospheric  $[\text{CO}_2]$ ,  $C_a$ ), maximal assimilation ( $A_{max}$ ) rates (PPFD  $2000 \mu\text{mol m}^{-2}\text{s}^{-1}$ ,  $1200 \text{ ppm}$   $C_a$ ),  
 460  $\text{CO}_2$  compensation point ( $\Gamma$ ), carboxylation efficiency, transpiration, stomatal conductance, water  
 461 use efficiency ( $WUE$ ), and carbon isotope composition ( $\delta^{13}\text{C}$ ). Asterisks indicate significant  
 462 differences between accessions by phylogenetic relatedness (Student's t-test, \* $P < 0.05$ , \*\* $P < 0.01$ ,  
 463 \*\*\* $P < 0.001$ , \*\*\*\* $P < 0.0001$ ,  $n=15$  for Asia and W. Africa,  $n=12$  for E. Africa).

464

465 **Supplementary Table 2. Pearson product-moment correlation coefficients for Kranz**  
 466 **anatomy traits**

|                            | <b>Vein Density</b> | <b>Inter-vein distance</b>                   | <b>BS area</b>     | <b>No BS cells</b> | <b>BS Cell size</b> | <b>Stomatal density</b> |
|----------------------------|---------------------|----------------------------------------------|--------------------|--------------------|---------------------|-------------------------|
| <b>Vein Density</b>        | 1.00000<br>0        | -0.67055 <sup>1</sup><br>0.0001 <sup>2</sup> | -0.58132<br>0.0015 | -0.05299<br>0.7929 | -0.57090<br>0.0019  | 0.56796<br>0.0020       |
| <b>Inter-vein distance</b> |                     | 1.00000<br>0                                 | 0.70598<br><.0001  | 0.14009<br>0.4859  | 0.64649<br>0.0003   | -0.66987<br>0.0001      |
| <b>BS area</b>             |                     |                                              | 1.00000<br>0       | 0.41457<br>0.0316  | 0.80687<br><.0001   | -0.49121<br>0.0093      |
| <b>No BS cells</b>         |                     |                                              |                    | 1.00000<br>0       | -0.19126<br>0.3393  | 0.01588<br>0.9373       |
| <b>BS Cell size</b>        |                     |                                              |                    |                    | 1.00000<br>0        | -0.50532<br>0.0072      |
| <b>Stomatal density</b>    |                     |                                              |                    |                    |                     | 1.00000<br>0            |

467 <sup>1</sup>Correlation coefficient ( $\rho$ ), <sup>2</sup>P-value, under H<sub>0</sub>:  $\rho=0$ ; n=27.

468

469

470

**Supplementary Table 3. List of primers for qRT-PCR analyses**

| <b>Gene</b>                                                                    | <b>Sequence (5'-3')</b>   |                          |
|--------------------------------------------------------------------------------|---------------------------|--------------------------|
|                                                                                | <b>Forward</b>            | <b>Reverse</b>           |
| <i>ACTIN</i>                                                                   | TCCGACCCGATGTGATGTTATGGT  | CAATCACTTTCCGGCTGCAACCAA |
| <i>PHOSPHOENOLPYRUVATE CARBOXYLASE 2 (PEPC)</i>                                | CGACCCAAGTTTCCATGTCAAGGT  | AGGAGCATATTCGCTCTTCGGGTT |
| <i>PYRUVATE, ORTHOPHOSPHATE DIKINASE (PPDK)</i>                                | AGTGGGACAGGTCGTATTCA      | CTCGAACCAAGATCGCACTC     |
| <i>RIBULOSE-1,5-BISPHOSPHATE CARBOXYLASE/OXYGENASE SMALL SUBUNIT 1A (RbcS)</i> | TGGATTCGACAACCTCCCGTCAAGT | TTACAGCCAGAAGGCCGTGTGATA |
| <i>NAD-DEPENDENT MALIC ENZYME 2 (NAD-ME)</i>                                   | AGGATCGTGAAGGATGTTGAGGCT  | TTCCTGAATTCCGCTATGGCGTCT |

471
